# Supplementary material for: Efficient adsorption of organic dyes on a flexible single-wall carbon nanotube film
Source: Royal Society of Chemistry journal article supplement (doi:10.1039/c5ta08627b), 2015-12-14
Supplement: c5ta08627b3.pdf [file c5ta08627b3.pdf]

**Supplementary Material (ESI) for Journal of Materials Chemistry A**  
**This journal is © The Royal Society of Chemistry**

---

**Efficient adsorption of organic dyes on a flexible single-wall  
carbon nanotube film**

Jian Luan,<sup>†</sup> Peng-Xiang Hou,<sup>†</sup> Chang Liu,<sup>\*</sup> Chao Shi, Guo-Xian Li and Hui-Ming Cheng

*Shenyang National Laboratory for Materials Science, Institute of Metal Research, Chinese*

*Academy of Sciences, Shenyang 110016, P. R. China.*

*E-mail: [cliu@imr.ac.cn](mailto:cliu@imr.ac.cn); Fax: +86-24-23903126; Tel: +86-24-83978280*

**ELECTRONIC SUPPLEMENTARY INFORMATION**

**Experimental section**

**Origin of raw single-wall carbon nanotubes (SWCNTs)**

The SWCNTs used in this study were purchased from Shenzhen Nanotech Port Co. Ltd, China.

No further purification was performed before the fabrication of the SWCNT films.

**Fabrication of flexible SWCNT films**

Flexible SWCNT films were fabricated by a simple filtration method. About 20 mg of SWCNTs were ultrasonicated in 200 mL of a 0.5 wt% sodium dodecyl sulfate (SDBS) water solution. The suspension was then filtered using a porous cellulose membrane filter with a pore diameter of 0.42 μm. The sheet resistivity of the films was measured by a four-point probe meter (4-probe tech.).

**Characterization**

The morphology and structure of the SWCNT films were characterized by scanning electron microscopy (SEM, Nova NanoSEM 430), Raman spectroscopy (Jobin Yvon HR800), thermogravimetric analysis (NETZSCH STA 449C), and transmission electron microscopy (TEM, Tecnai F20, 200 kV). The specific surface area and pore structure of the samples were investigated with an automatic volumetric sorption analyzer (ASAP 2020 M) using N<sub>2</sub> as the adsorbate at -196 °C. The UV-vis absorption spectra were obtained using a SP-1900 UV-vis spectrophotometer.

**HNO<sub>3</sub> treatment of the SWCNT films**

To remove residual metal catalyst, the SWCNT films were treated by dipping in a 67% HNO<sub>3</sub> solution for 30 min.

#### **Dye adsorption and desorption**

Four dyes, Rhodamine B (RhB), methylene blue (MB), methylene orange (MO), and congo red (CR), were used to investigate the adsorption performance of the as-prepared SWCNT films. In a typical experiment, a SWCNT film (~5 mg) was put into an aqueous dye solution (100 mL, 10 mg L<sup>-1</sup>), followed by stirring at room temperature. At predetermined time intervals of 30 min, the dye concentration was measured by using a UV-*vis* spectrophotometer at the maximum absorbance of each dye (553 nm, 664 nm, 465 nm, and 490 nm for RhB, MB, MO, and CR, respectively). For desorption, the SWCNT film containing the dye was put into ethanol followed by shaking. The adsorbed RhB gradually desorbed from the film and changed the color of the ethanol to pink. After repeatedly washing with ethanol until the solution was colorless, the SWCNT film was dried at 50 °C for 10 h for repeated use.

The dye adsorption amount  $q_t$  (mg g<sup>-1</sup>) was calculated by:  $q_t = (C_0 - C_t)V/W$ . Where,  $C_0$  and  $C_t$  (mg L<sup>-1</sup>) are the liquid-phase concentration of dyes at the beginning and after time  $t$  (min), respectively.  $V$  (L) is the volume of the solution, and  $W$  (g) is the mass of the SWCNT film used.

#### **SEM and TEM characterizations of the SWCNT film**

As shown in Fig. S1a, the film is composed of numerous entangled CNT bundles that are tens of micrometers in length. These bundles have a clean surface and straight tube walls (Fig. S1c). HRTEM observations reveal that there is occasionally an amorphous carbon coating on the outer surface of the SWCNTs (Fig. S1d). Moreover, the walls of the SWCNTs are well resolved, indicating good structural integrity.

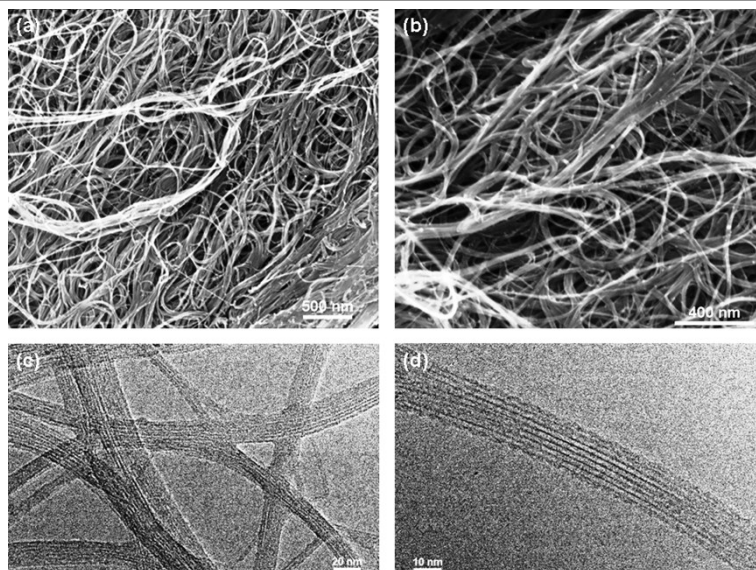

**Fig. S1** Typical SEM images of the SWCNT films (a) before and (b) after HNO<sub>3</sub>-treatment. (c, d) TEM images of the purified SWCNTs showing their high purity.

### Raman spectroscopy of the SWCNTs

Fig. S2 shows a typical Raman spectrum of the SWCNTs excited by a 633 nm laser. The G-band is very narrow and strong, while the D-band is very weak and almost invisible. The  $I_G/I_D$  ratio was calculated to be  $\sim 62$ , indicating the high quality of the SWCNTs.

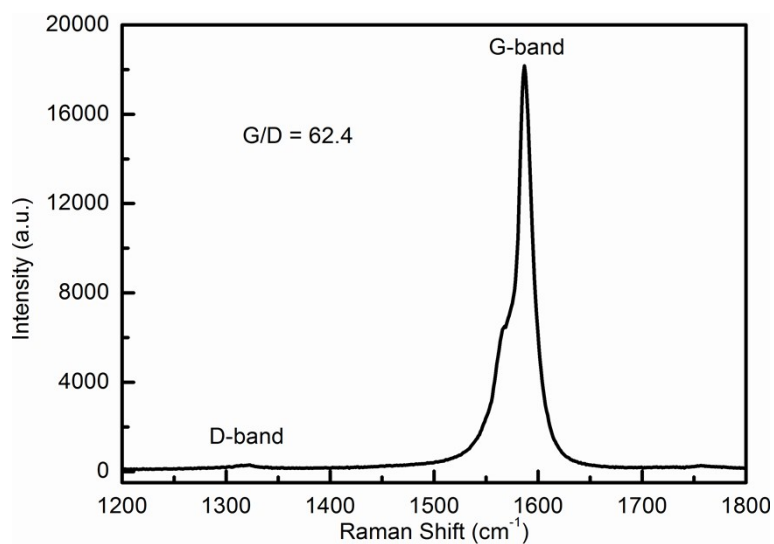

**Fig. S2** Raman spectrum of the SWCNTs excited with a 633 nm laser.

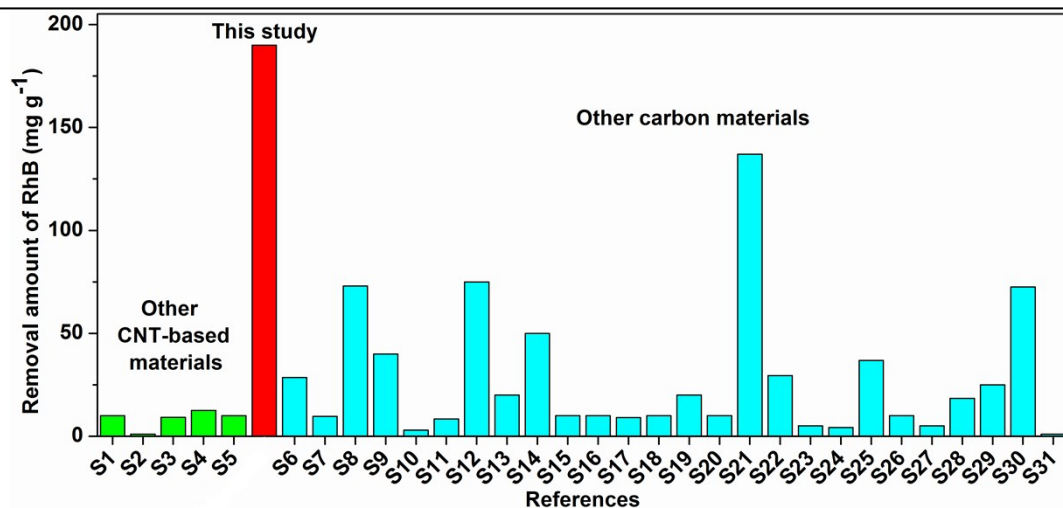

Fig. S3 A comparison of the RhB removal performance of different carbon materials.

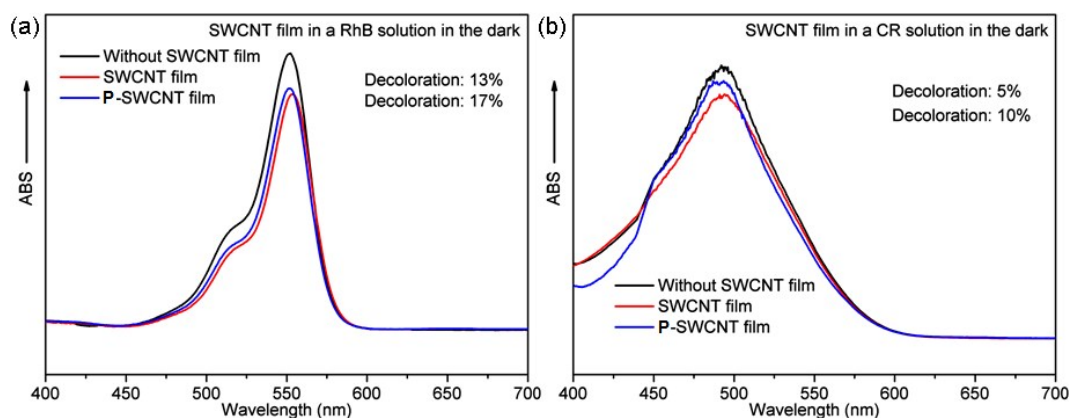

Fig. S4 UV-vis absorption spectra of (a) RhB and (b) CR solutions after 240 min in dark. The initial concentrations of RhB and CR:  $10 \text{ mg L}^{-1}$ ; the amount of adsorbent:  $5 \text{ mg}$ .

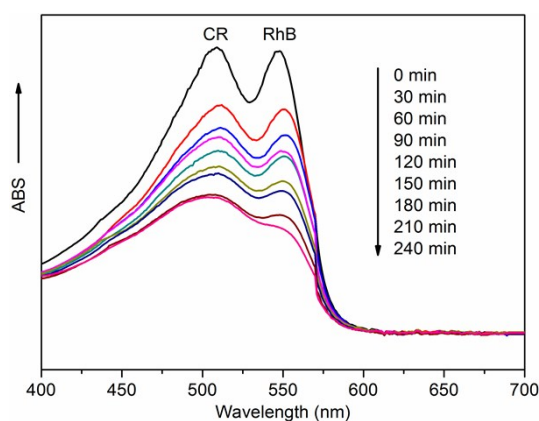

Fig. S5 The UV-vis absorption spectra of a mixed RhB and CR aqueous dye solution in the presence of an SWCNT film.

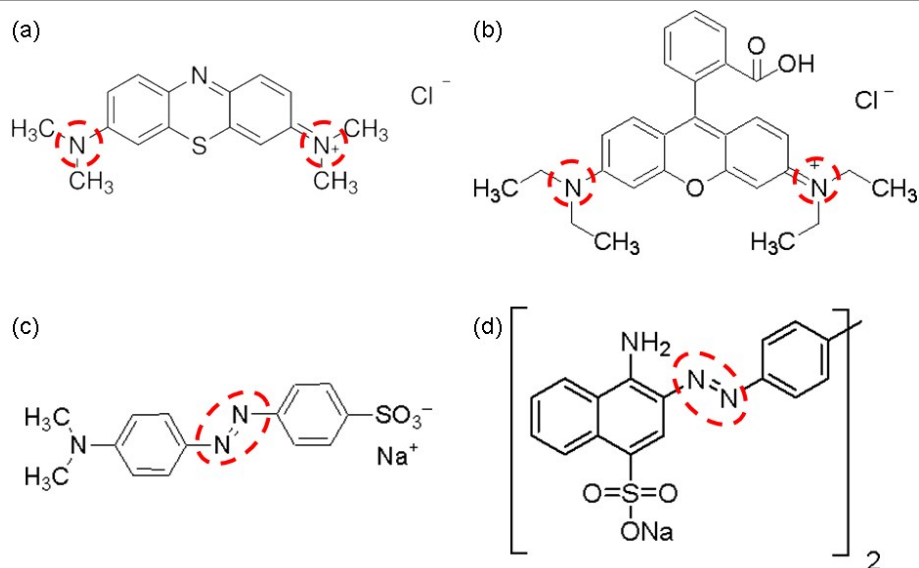

Fig. S6 Molecular formulae of (a) MB, (b) RhB, (c) MO, and (d) CR.

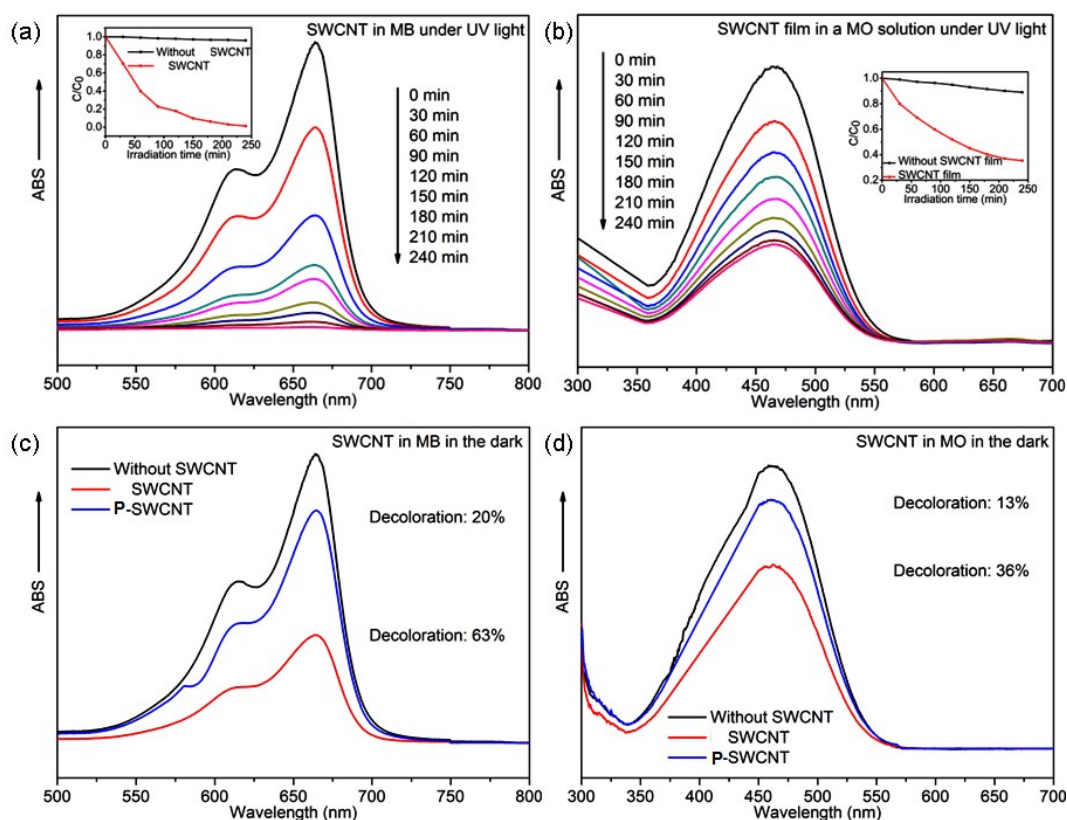

Fig. S7 UV-vis absorption spectra of (a) MB and (b) MO solutions after different times of UV light irradiation. Inset: decolorization rates of (a) MB and (b) MO with and without SWCNTs. UV-vis spectra of (c) MB and (d) MO solutions after 240 min in the dark. The initial concentration of RhB was 10 mg L<sup>-1</sup> and the amount of adsorbent was 5 mg.

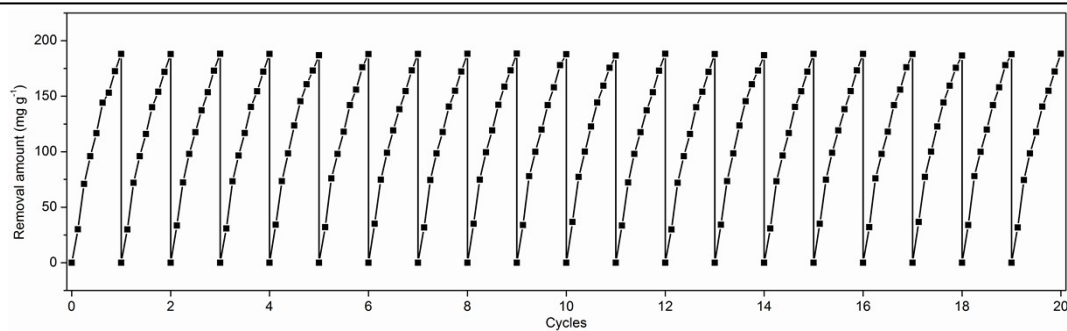

Fig. S8 The cycling stability of the adsorption/desorption of RhB on the SWCNT film.

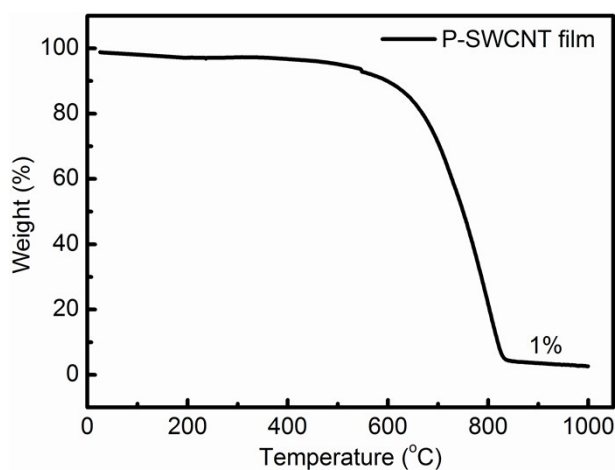

Fig. S9 TGA curve of a P-SWCNT film.

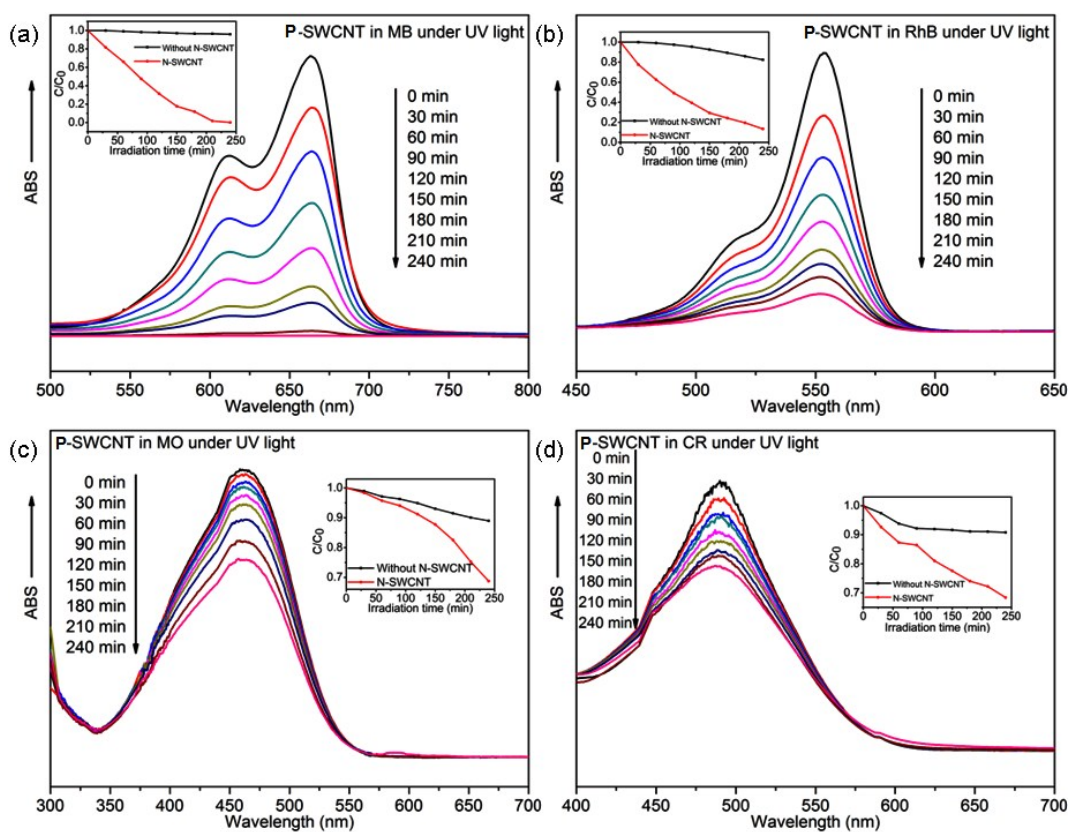



**Fig. S10** UV–vis absorption spectra of (a) MB, (b) RhB, (c) MO, and (d) CR solutions after different times of UV light irradiation in the presence of the P-SWCNT adsorbent. Inset: decolorization rates of MB, RhB, MO, and CR. The initial concentration of the MB, RhB, MO, and CR solutions was  $10 \text{ mg L}^{-1}$  and the amount of adsorbent (P-SWCNT) was 5 mg.

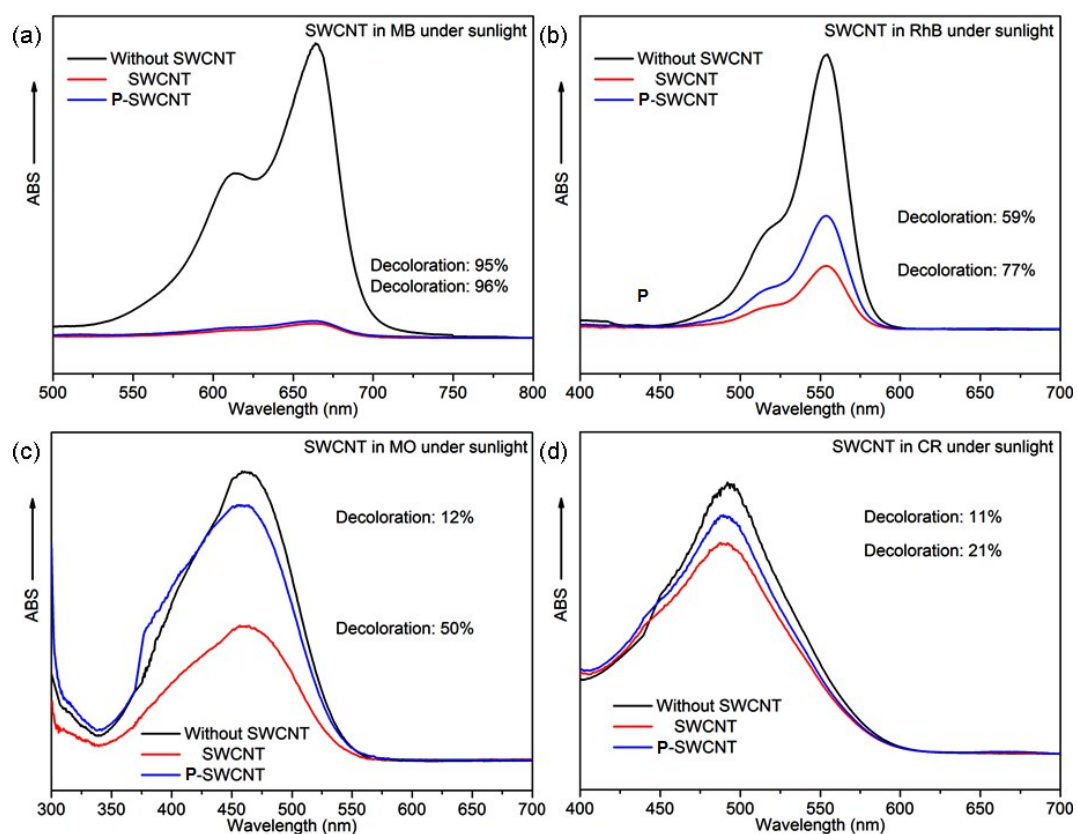

**Fig. S11** UV–vis absorption spectra of (a) MB, (b) RhB, (c) MO, and (d) CR solutions after 240 min under sunlight in the presence of a SWCNT film. The initial concentration of the MB, RhB, MO, and CR was  $10 \text{ mg L}^{-1}$  and the amount of adsorbent was 5 mg.

**Table S1** Comparison of the dyes adsorption performance of the SWCNT film with that of other reported carbon or carbon-containing materials.

| Dye | Adsorpter                                                                          | Removal amount (mg g <sup>-1</sup> ) | Reference |
|-----|------------------------------------------------------------------------------------|--------------------------------------|-----------|
| RhB | CNT/Ag <sub>3</sub> PO <sub>4</sub>                                                | 10                                   | S1        |
|     | Ni <sub>1-x</sub> Co <sub>x</sub> Fe <sub>2</sub> O <sub>4</sub> /MWCNTs           | 1                                    | S2        |
|     | CNT/TiO <sub>2</sub>                                                               | 9.23                                 | S3        |
|     | ZnO/N-CNTs                                                                         | 12.5                                 | S4        |
|     | MWCNT/BiOBr                                                                        | 10                                   | S5        |
|     | CdS/N-rGO                                                                          | 28.6                                 | S6        |
|     | AgI-RGO                                                                            | 9.68                                 | S7        |
|     | MPGC-900                                                                           | 73                                   | S8        |
|     | SiO <sub>2</sub> /GO                                                               | 40                                   | S9        |
|     | g-C <sub>3</sub> N <sub>4</sub> /SiO <sub>2</sub> -HNb <sub>3</sub> O <sub>8</sub> | 3                                    | S10       |
|     | Ti/g-C <sub>3</sub> N <sub>4</sub>                                                 | 8.33                                 | S11       |
|     | CNG                                                                                | 75                                   | S12       |
|     | g-C <sub>3</sub> N <sub>4</sub>                                                    | 20                                   | S13       |
|     | g-C <sub>3</sub> N <sub>4</sub> /BiOBr                                             | 50                                   | S14       |
|     | g-C <sub>3</sub> N <sub>4</sub> /TiO <sub>2</sub>                                  | 10                                   | S15       |
|     | SnO <sub>2-x</sub> /g-C <sub>3</sub> N <sub>4</sub>                                | 10                                   | S16       |
|     | WO <sub>3</sub> NRs/g-C <sub>3</sub> N <sub>4</sub>                                | 9.1                                  | S17       |
|     | Ag <sub>3</sub> VO <sub>4</sub> /g-C <sub>3</sub> N <sub>4</sub>                   | 10                                   | S18       |
|     | Al <sub>2</sub> O <sub>3</sub> /g-C <sub>3</sub> N <sub>4</sub>                    | 20                                   | S19       |
|     | CeO <sub>2</sub> /C <sub>3</sub> N <sub>4</sub> /N-rGO                             | 10                                   | S20       |
|     | 3D-MGFs                                                                            | 137                                  | S21       |
|     | 3D RGO-based hydrogels                                                             | 29.44                                | S22       |
|     | mC/C-ZnO                                                                           | 5                                    | S23       |
|     | MRGO                                                                               | 4.23                                 | S24       |
|     | Ptp-CN                                                                             | 36.8                                 | S25       |
|     | SiO <sub>2</sub> -C <sub>3</sub> N <sub>4</sub>                                    | 10                                   | S26       |



**Supplementary Material (ESI) for Journal of Materials Chemistry A**  
**This journal is © The Royal Society of Chemistry**

|    |                                                                   |        |           |
|----|-------------------------------------------------------------------|--------|-----------|
|    | Zn <sub>2</sub> SnO <sub>4</sub> /g-C <sub>3</sub> N <sub>4</sub> | 5      | S27       |
|    | CuFe <sub>2</sub> O <sub>4</sub> /g-C <sub>3</sub> N <sub>4</sub> | 18.4   | S28       |
|    | Bi-Bi <sub>2</sub> O <sub>3</sub> /C                              | 25     | S29       |
|    | GSs                                                               | 72.5   | S30       |
|    | Fe <sub>3</sub> O <sub>4</sub> /C/Cu <sub>2</sub> O               | 0.96   | S31       |
|    | SWCNT film                                                        | 190    | This work |
|    | Graphene nanosheet                                                | 111.6  | S32       |
|    | Ni/C nanomaterial                                                 | 175.2  | S33       |
| MB | SWCNT film                                                        | 198    | This work |
|    | Fe/ordered mesoporous carbon                                      | 316    | S34       |
|    | Calcium alginate/MWCNTs                                           | 606.1  | S35       |
|    | Chitosan/Fe <sub>2</sub> O <sub>3</sub> /MWCNTs                   | 66.9   | S36       |
|    | SWCNT film                                                        | 130    | This work |
| MO | Mesoporous carbon                                                 | 294.1  | S37       |
|    | Pinecone derived activated carbon                                 | 404.4  | S38       |
|    | MWCNTs/Fe <sub>3</sub> O <sub>4</sub> /PANI                       | 544.99 | S39       |
|    | SWCNT film                                                        | 90     | This work |
|    | Functionalized MWNTs                                              | 148    | S40       |
| CR | Activated carbon                                                  | 300    | S41       |
|    | Activated carbon fibers                                           | 557    | S42       |
|    | CNT/Mg(Al)O nanocomposites                                        | 1250   | S43       |

**Scheme S1** The adsorption amount ( $\text{mg g}^{-1}$ ) and color change of dye solutions.

| SWCNT                                                                               | Dye                                                                                 | UV light                                                                              | Sunlight                                                                              | Dark                                                                                  |
|-------------------------------------------------------------------------------------|-------------------------------------------------------------------------------------|---------------------------------------------------------------------------------------|---------------------------------------------------------------------------------------|---------------------------------------------------------------------------------------|
| Original                                                                            | MB                                                                                  | 198                                                                                   | 192                                                                                   | 126                                                                                   |
|                                                                                     |    |      |    |    |
|                                                                                     | RhB                                                                                 | 190                                                                                   | 154                                                                                   | 34                                                                                    |
|                                                                                     |    |      |    |    |
|                                                                                     | MO                                                                                  | 130                                                                                   | 100                                                                                   | 72                                                                                    |
|    |    |    |    |                                                                                       |
|                                                                                     | CR                                                                                  | 90                                                                                    | 42                                                                                    | 20                                                                                    |
|   |   |   |   |                                                                                       |
| $\text{HNO}_3$ -purified                                                            | MB                                                                                  | 198                                                                                   | 190                                                                                   | 40                                                                                    |
|                                                                                     |  |    |  |  |
|                                                                                     | RhB                                                                                 | 174                                                                                   | 118                                                                                   | 26                                                                                    |
|                                                                                     |  |    |  |  |
|                                                                                     | MO                                                                                  | 64                                                                                    | 24                                                                                    | 26                                                                                    |
|  |  |  |  |                                                                                       |
|                                                                                     | CR                                                                                  | 64                                                                                    | 22                                                                                    | 10                                                                                    |
|  |  |  |  |                                                                                       |

**References:**

- [S1] H. Xu, C. Wang, Y. H. Song, J. X. Zhu, Y. G. Xu, J. Yan, Y. X. Song and H. M. Li, *Chem. Eng. J.*, 2014, **241**, 35.
- [S2] C. Singh, S. Bansal, V. Kumar and S. Singhal, *Ceram. Int.*, 2015, **41**, 3595.
- [S3] Y. L. Xie, H. H. Qian, Y. J. Zhong, H. M. Guo and Y. Hu, *Int. J. Photoenergy*, 2012, **2012**, 682138.
- [S4] C. Y. Yu, Y. R. Wang, Y. Liu, C. F. Guo and Y. Hu, *Mater. Lett.*, 2013, **100**, 278.
- [S5] J. X. Xia, J. Di, S. Yin, H. M. Li, L. Xu, Y. G. Xu, C. Y. Zhang and H. M. Shu, *Ceram. Int.*, 2014, **40**, 4607.
- [S6] S. L. Wang, J. J. Li, X. D. Zhou, C. C. Zheng, J. Q. Ning, Y. J. Zhong and Y. Hu, *J. Mater. Chem. A*, 2014, **2**, 19815.
- [S7] D. A. Reddy, S. Lee, J. Choi, S. Park, R. Ma, H. Yang and T. K. Kim, *Appl. Surf. Sci.*, 2015, **341**, 175.
- [S8] L. Sun, C. G. Tian, L. Wang, J. L. Zou, G. Mu and H. G. Fu, *J. Mater. Chem.*, 2011, **21**, 7232.
- [S9] J. Iturbe-Ek, J. Andrade-Martínez, R. Gómez and V. Rodríguez-González, *Mater. Lett.*, 2015, **142**, 75.
- [S10] H. Q. Pan, X. K. Li, Z. J. Zhuang and C. Zhang, *J. Mol. Catal. A: Chem.*, 2011, 345, 90.
- [S11] Y. G. Wang, Y. Z. Wang, Y. T. Chen, C. C. Yin, Y. H. Zuo and L. F. Cui, *Mater. Lett.*, 2015, **139**, 72.
- [S12] Z. J. Huang, F. B. Li, B. F. Chen and G. Q. Yuan, *RSC Adv.*, 2015, **5**, 14027.
- [S13] Z. J. Huang, F. B. Li, B. F. Chen and G. Q. Yuan, *Catal. Sci. Technol.*, 2014, **4**, 4258.
- [S14] M. Q. He, D. X. Zhao, J. X. Xia, L. Xu, J. Di, H. Xu, S. Yin and H. M. Li, *Mater. Sci. Semicond. Process.*, 2015, **32**, 117.
- [S15] Z. W. Tong, D. Yang, T. X. Xiao, Y. Tian and Z. Y. Jiang, *Chem. Eng. J.*, 2015, **260**, 117.
- [S16] Y. M. He, L. H. Zhang, M. H. Fan, X. X. Wang, M. L. Walbridge, Q. Y. Nong, Y. Wu and L. H. Zhao, *Sol. Energy Mater. Sol. Cells*, 2015, **137**, 175.
- [S17] J. L. Zhao, Z. Y. Ji, X. P. Shen, H. Zhou and L. B. Ma, *Ceram. Int.*, 2015, **41**, 5600.
- [S18] S. Z. Wu, K. Li and W. D. Zhang, *Appl. Surf. Sci.*, 2015, **324**, 324.
- [S19] F. T. Li, Y. Zhao, Q. Wang, X. J. Wang, Y. J. Hao, R. H. Liu and D. S. Zhao, *J. Hazard.*

- Mater.*, 2015, **283**, 371.
- [S20] L. Wang, J. Ding, Y. Y. Chai, Q. Q. Liu, J. Ren, X. Liu and W. L. Dai, *Dalton Trans.*, 2015, **44**, 11223.
- [S21] Y. M. Yang, G. W. Hu, F. J. Chen, J. Liu, W. S. Liu, H. L. Zhang and B. D. Wang, *Chem. Commun.*, 2015, **51**, 14405.
- [S22] J. N. Tiwari, K. Mahesh, N. H. Le, K. C. Kemp, R. Timilsina, R. N. Tiwari and K. S. Kim, *Carbon*, 2013, **56**, 173.
- [S23] F. X. Wang, L. Liang, L. Shi, M. S. Liu and J. M. Sun, *Dalton Trans.*, 2014, **43**, 16441.
- [S24] H. M. Sun, L. Y. Cao and L. H. Lu, *Nano Res.*, 2011, **4**, 550.
- [S25] S. Z. Hu, L. Ma, H. Y. Wang, L. Zhang, Y. F. Zhao and G. Wu, *RSC Adv.*, 2015, **5**, 31947.
- [S26] M. Shalom, S. Inal, D. Neher and M. Antonietti, *Catal. Today*, 2014, **225**, 185.
- [S27] L. H. Zhang, X. X. Wang, Q. Y. Nong, H. J. Lin, B. T. Teng, Y. T. Zhang, L. H. Zhao, T. H. Wu and Y. M. He, *Appl. Surf. Sci.*, 2015, **329**, 143.
- [S28] J. Y. Shen, Z. S. Cui, Z. W. Wu, J. X. Wang, Q. Ning and X. M. Lv, *Mater. Res. Innovations*, 2015, **19**, 187.
- [S29] S. S. Chu, C. Yang, C. G. Niu, Z. J. Li, J. D. Wang and X. T. Su, *Mater. Lett.*, 2014, **136**, 366.
- [S30] J. P. Zhao, W. C. Ren and H. M. Cheng, *J. Mater. Chem.*, 2012, **22**, 20197.
- [S31] S. K. Li, F. Z. Huang, Y. Wang, Y. H. Shen, L. G. Qiu, A. J. Xie and S. J. Xu, *J. Mater. Chem.*, 2011, **21**, 7459.
- [S32] Z. J. Fan, W. Kai, J. Yan, T. Wei, L. J. Zhi, J. Feng, Y. M. Ren, L. P. Song and F. Wei, *ACS Nano*, 2011, **5**, 191.
- [S33] J. Gong, K. Yao, J. Liu, X. Wen, X. C. Chen, Z. W. Jiang, E. Mijowska and T. Tang, *Chem. Eng. J.*, 2013, **215–216**, 339.
- [S34] X. M. Peng, D. P. Huang, T. Odoom-Wubah, D. F. Fu, J. L. Huang and Q. D. Qin, *J. Colloid Interf. Sci.*, 2014, **430**, 272.
- [S35] K. Y. Sui, Y. J. Li, R. Z. Liu, Y. Zhang, X. Zhao, H. C. Liang and Y. Z. Xia, *Carbohydr. Polym.*, 2012, **90**, 399.
- [S36] H. Y. Zhu, R. Jiang, L. Xiao and G. M. Zeng, *Bioresour. Technol.*, 2010, **101**, 5063.

- [S37] N. Mohammadi, H. Khani, V. K. Gupta, E. Amereh and S. Agarwal, *J. Colloid Interf. Sci.*, 2011, **362**, 457.
- [S38] M. Samarghandi, M. Hadi, S. Moayedi and F. Askari, *Iran. J. Environ. Health Sci. Eng.*, 2009, **6**, 285.
- [S39] Y. Zhao, H. L. Chen, J. Li and C. L. Chen, *J. Colloid Interf. Sci.*, 2015, **450**, 189.
- [S40] A. K. Mishra, T. Arockiadoss and S. Ramaprabhu, *Chem. Eng. J.*, 2010, **162**, 1026.
- [S41] M. K. Purkait, A. Maiti, S. DasGupta and S. De, *J. Hazard. Mater.*, 2007, **145**, 287.
- [S42] C. Pelekani and V. L. Snoeyink, *Carbon*, 2001, **39**, 25.
- [S43] S. X. Yang, L. Y. Wang, X. D. Zhang, W. J. Yang and G. L. Song, *Chem. Eng. J.*, 2015, **275**, 315.
